# Supplementary material for: Enhanced photoelectrochemical water splitting efficiency of hematite electrodes with aqueous metal ions as in situ homogenous surface passivation agents
Source: Royal Society of Chemistry journal article supplement (doi:10.1039/c6cp04993a), 2016-01-01
Supplement: c6cp04993a1.pdf [file c6cp04993a1.pdf]

# Supporting Information

1

2

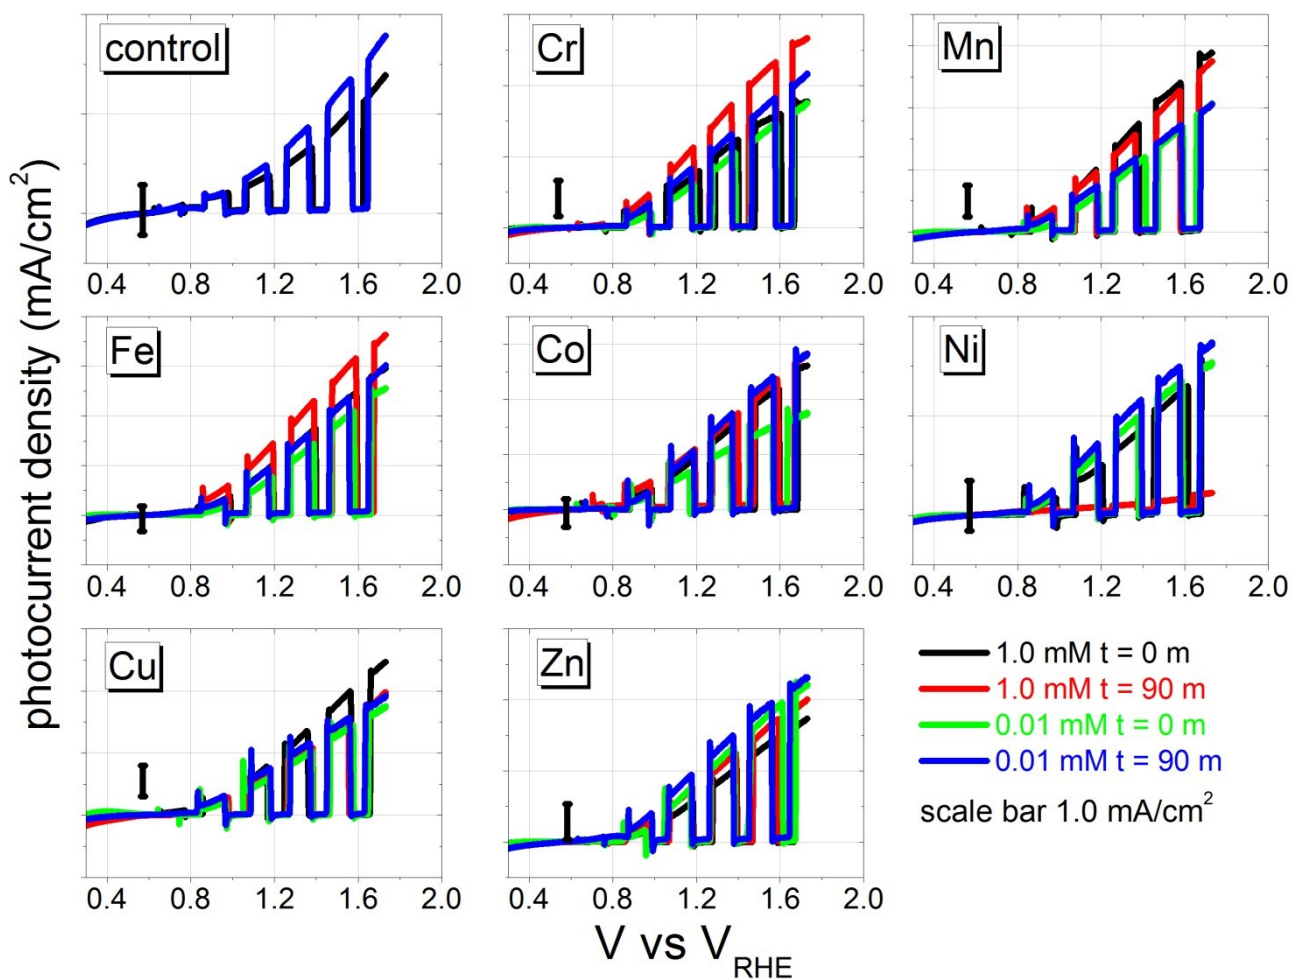

3

4 Fig. S1. Representative J-V curves of hematite electrodes in different metal ion solutions

5

6

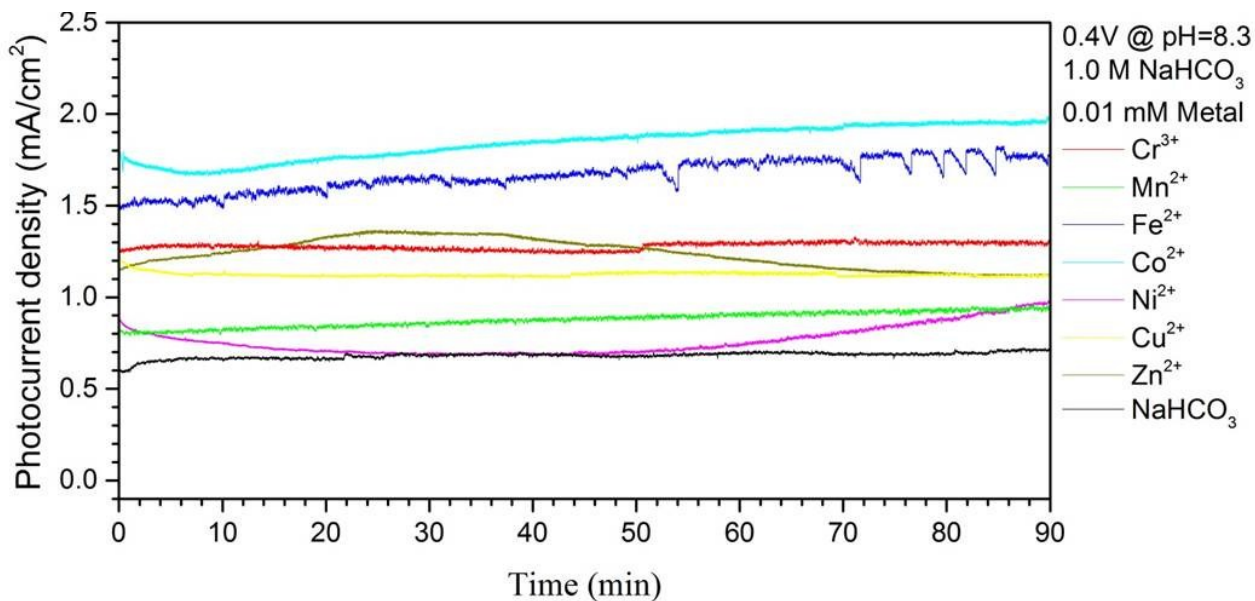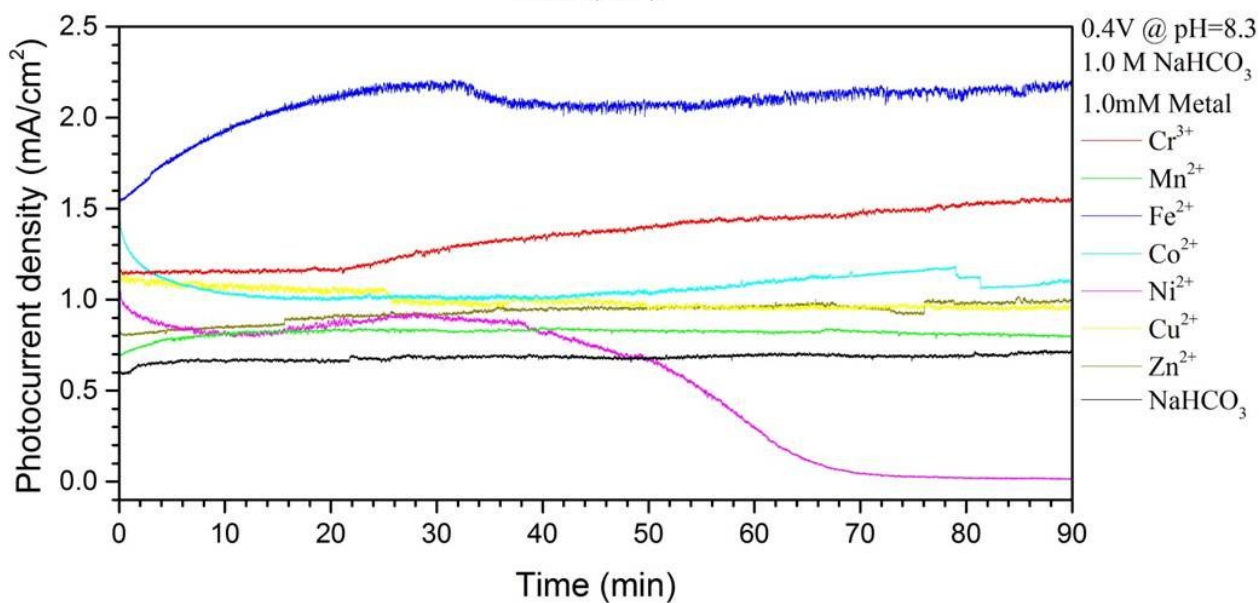

7  
8 Fig. S2. Representative J-t curves of hematite electrodes with 0.4 V<sub>SCE</sub> applied bias in different  
9 metal ion solutions.

10

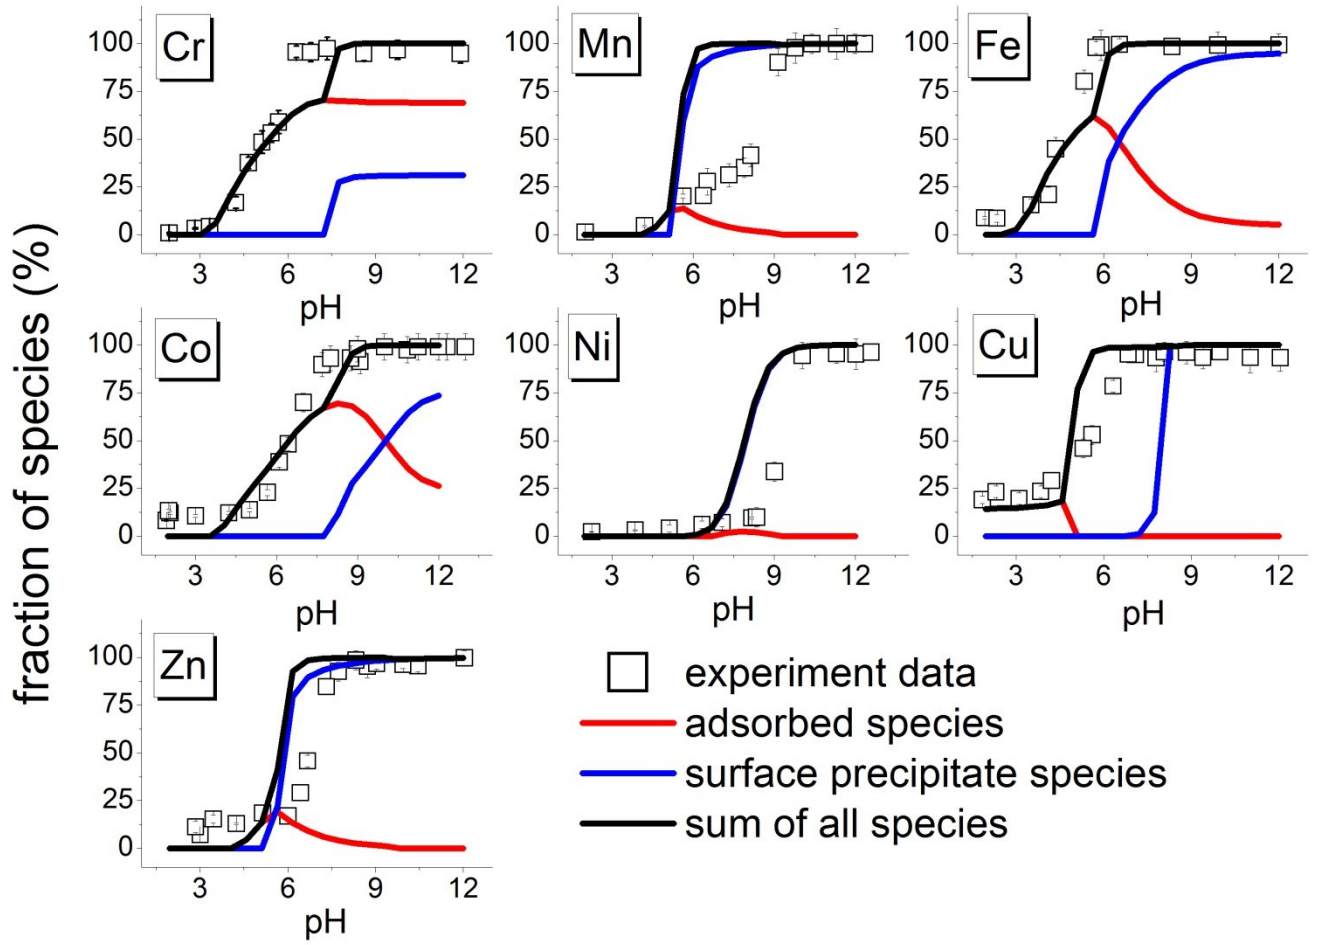

11

12 Fig. S3 Representative simulation of the distribution of metal ions on the surface of hematite.

13

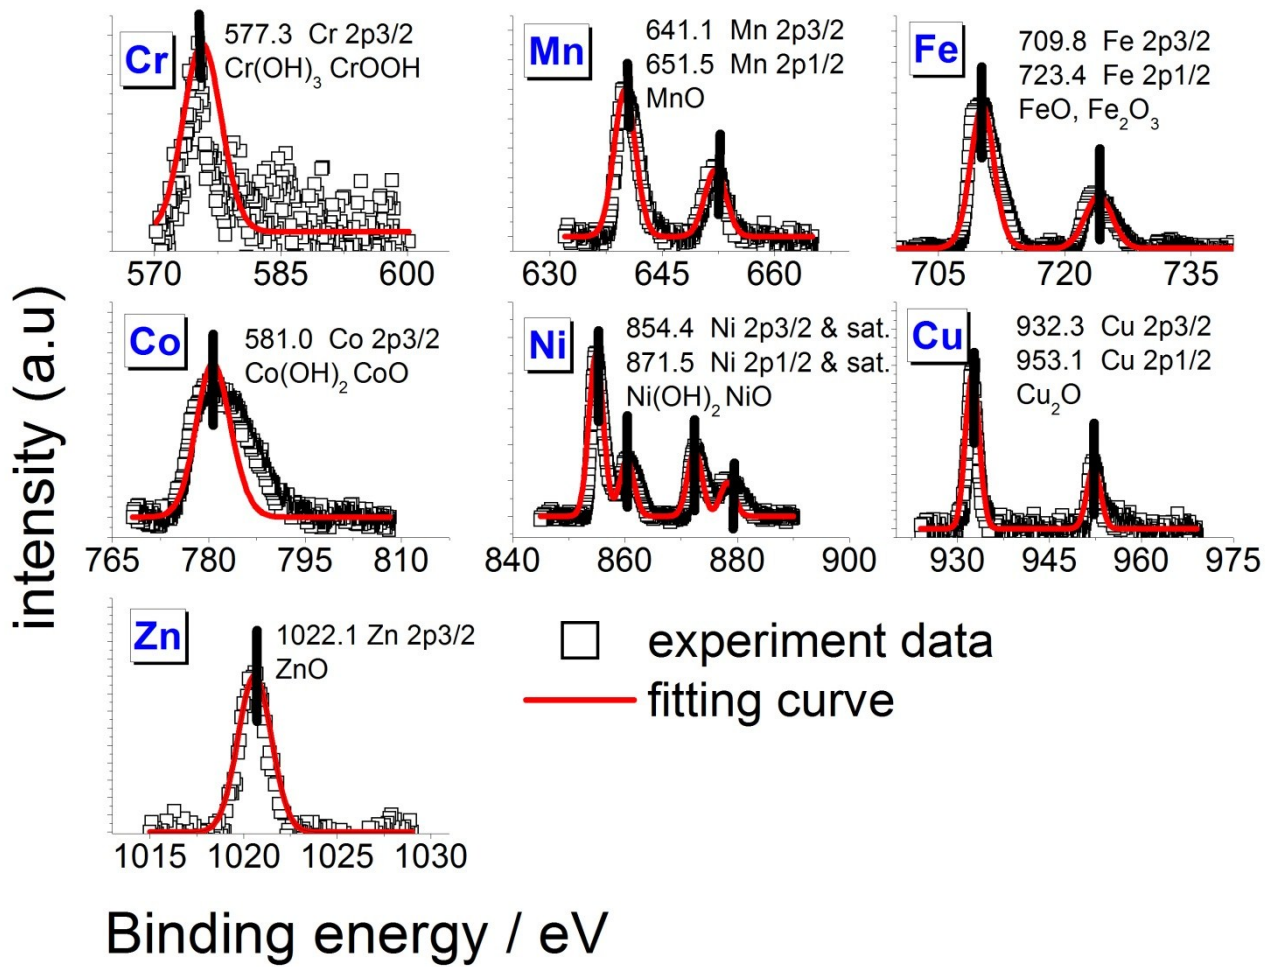

14  
 15 Fig. S4 Representative XPS spectra on the surface of hematite after 90 min of illumination.  
 16  
 17
